# Supplementary material
Source: MDPI journal article supplement (https://www.mdpi.com/2227-7102/13/12/1235)

**Impact of Low–Stakes Assessments on Student Attitudes and Self-Concept  
in General Chemistry**

| <b>Table of Contents</b>                                                                                                                                       |             |
|----------------------------------------------------------------------------------------------------------------------------------------------------------------|-------------|
| <b>Item Description</b>                                                                                                                                        | <b>Page</b> |
| <b>Table S1.</b><br>Demographic breakdown of the Fall 2021 sections.                                                                                           | S2          |
| <b>Table S2.</b><br>Results of Confirmatory Factor Analysis of ASCIv2 items.                                                                                   | S3          |
| <b>Table S3.</b><br>Results of Confirmatory Factor Analysis of CSCI items.                                                                                     | S4          |
| <b>Table S4.</b><br>Correlations among measures in the quiz-retake section of general chemistry I                                                              | S5          |
| <b>Table S5.</b><br>Correlations among measures in the quiz-retake section of general chemistry II                                                             | S6          |
| <b>Table S6.</b><br>Group Statistics for the general chemistry I retake comparison.                                                                            | S7          |
| <b>Table S7.</b><br>Group Statistics for the general chemistry II retake comparison.                                                                           | S8          |
| <b>Table S8.</b><br>Paired t-test results for female students across general chemistry I and II courses for the quiz-retake sections.                          | S9          |
| <b>Table S9.</b><br>Paired t-test results for male students across general chemistry I and II courses for the quiz-retake sections.                            | S9          |
| <b>Table S10.</b><br>Paired t-test results for general chemistry I group Q1r students across general chemistry I and II courses for the quiz-retake sections.  | S10         |
| <b>Table S11.</b><br>Paired t-test results for general chemistry I group Q1nr students across general chemistry I and II courses for the quiz-retake sections. | S10         |
| <b>Figure S1.</b><br>Evolution of assessment strategy.                                                                                                         | S11         |
| <b>Figure S2.</b><br>AMOS v29 path diagram with standardized estimates for the ASCIv2 CFA, using data from all sections.                                       | S12         |
| <b>Figure S3.</b><br>AMOS v29 path diagram with standardized estimates for the CSCI CFA, using data from all sections.                                         | S13         |

**Table S1.** Demographic breakdown of the Fall 2021 sections.

| <b>Category</b>                           | <b><i>n</i></b> | <b>Percentage</b> |
|-------------------------------------------|-----------------|-------------------|
| First Generation                          | 140             | 23%               |
| non-First Generation                      | 456             | 77%               |
| White                                     | 387             | 65%               |
| Hispanic/Latino                           | 107             | 18%               |
| Black or African American                 | 23              | 4%                |
| Native Hawaiian or Other Pacific Islander | 0               | 0%                |
| Asian                                     | 50              | 8%                |
| American Indian or Alaska Native          | 0               | 0%                |
| Two or More Races                         | 16              | 3%                |
| International                             | 3               | 1%                |
| Unknown                                   | 10              | 2%                |
| Male                                      | 260             | 44%               |
| Female                                    | 336             | 56%               |
| College: Arts & Sciences                  | 137             | 23%               |
| College: Engineering                      | 184             | 31%               |
| College: Health Sciences                  | 270             | 45%               |
| College: Other                            | 5               | 1%                |

**Table S2.** Fit indices from confirmatory factor analysis of the ASCIv2 data using AMOS v29.<sup>65,66</sup>

| Description                                          | $\chi^2/\text{df}$ | RMSEA<br>( $< 0.08$ ) <sup>67</sup> | SRMR<br>( $< 0.1$ ) <sup>68</sup> | CFI<br>( $> 0.90$ ) | GFI<br>( $> 0.90$ ) | IFI<br>( $> 0.90$ ) | NFI<br>( $> 0.90$ ) |
|------------------------------------------------------|--------------------|-------------------------------------|-----------------------------------|---------------------|---------------------|---------------------|---------------------|
| Two-factor Model<br>All sections<br>(N = 518)        | 5.18               | 0.090                               | 0.056                             | 0.91                | 0.95                | 0.91                | 0.89                |
| Two-factor Model<br>Quiz-retake section<br>(N = 166) | 1.29               | 0.042                               | 0.043                             | 0.98                | 0.97                | 0.98                | 0.92                |

**Table S3.** Fit indices from confirmatory factor analysis of the CSCI data using AMOS v29.<sup>65,66</sup>

| Description                                           | $\chi^2/\text{df}$ | RMSEA<br>( $< 0.08$ ) <sup>67</sup> | SRMR<br>( $< 0.1$ ) <sup>68</sup> | CFI<br>( $> 0.90$ ) | GFI<br>( $> 0.90$ ) | IFI<br>( $> 0.90$ ) | NFI<br>( $> 0.90$ ) |
|-------------------------------------------------------|--------------------|-------------------------------------|-----------------------------------|---------------------|---------------------|---------------------|---------------------|
| Five-factor Model<br>All sections<br>(N = 509)        | 3.57               | 0.071                               | 0.082                             | 0.80                | 0.78                | 0.80                | 0.75                |
| Five-factor Model<br>Quiz-retake section<br>(N = 165) | 1.97               | 0.077                               | 0.099                             | 0.78                | 0.70                | 0.79                | 0.64                |

**Table S4.** Correlations among Measures in the quiz-retake general chemistry I section.

|          |                     | Correlations |         |        |        |         |        |        |        |        |         |         |         |          |         |         |         |
|----------|---------------------|--------------|---------|--------|--------|---------|--------|--------|--------|--------|---------|---------|---------|----------|---------|---------|---------|
|          |                     | M0           | M00     | M1     | M2     | M3      | M4     | M5     | M6     | M7     | Qavei   | Qaver   | Qdiff   | Nretakes | Midterm | Final   | Overall |
| M0       | Pearson Correlation | 1            | .488**  | .230** | .172*  | .439**  | .184*  | .155*  | .049   | -.016  | .655**  | .647**  | -.316** | -.375**  | .589**  | .571**  | .641**  |
|          | Sig. (2-tailed)     |              | <.001   | .003   | .026   | <.001   | .018   | .046   | .530   | .835   | <.001   | <.001   | <.001   | <.001    | <.001   | <.001   | <.001   |
|          | N                   | 167          | 167     | 166    | 166    | 165     | 165    | 165    | 165    | 165    | 167     | 167     | 167     | 167      | 167     | 167     | 167     |
| M00      | Pearson Correlation | .488**       | 1       | .290** | .213** | .377**  | .270** | .175*  | .123   | .115   | .472**  | .460**  | -.252** | -.310**  | .411**  | .468**  | .486**  |
|          | Sig. (2-tailed)     | <.001        |         | <.001  | .006   | <.001   | <.001  | .025   | .114   | .142   | <.001   | <.001   | .001    | <.001    | <.001   | <.001   | <.001   |
|          | N                   | 167          | 167     | 166    | 166    | 165     | 165    | 165    | 165    | 165    | 167     | 167     | 167     | 167      | 167     | 167     | 167     |
| M1       | Pearson Correlation | .230**       | .290**  | 1      | .561** | .323**  | .583** | .211** | .116   | .242** | .160*   | .176*   | .000    | -.112    | .172*   | .181*   | .163*   |
|          | Sig. (2-tailed)     | .003         | <.001   |        | <.001  | <.001   | <.001  | .007   | .136   | .002   | .039    | .024    | .999    | .152     | .027    | .020    | .035    |
|          | N                   | 166          | 166     | 166    | 166    | 165     | 165    | 165    | 165    | 165    | 166     | 166     | 166     | 166      | 166     | 166     | 166     |
| M2       | Pearson Correlation | .172*        | .213**  | .561** | 1      | .343**  | .679** | .260** | .206** | .310** | .213**  | .230**  | -.015   | -.112    | .120    | .155*   | .169*   |
|          | Sig. (2-tailed)     | .026         | .006    | <.001  |        | <.001   | <.001  | <.001  | .008   | <.001  | .006    | .003    | .849    | .151     | .123    | .046    | .030    |
|          | N                   | 166          | 166     | 166    | 166    | 165     | 165    | 165    | 165    | 165    | 166     | 166     | 166     | 166      | 166     | 166     | 166     |
| M3       | Pearson Correlation | .439**       | .377**  | .323** | .343** | 1       | .296** | .404** | .281** | .256** | .418**  | .410**  | -.212** | -.273**  | .432**  | .429**  | .460**  |
|          | Sig. (2-tailed)     | <.001        | <.001   | <.001  | <.001  |         | <.001  | <.001  | <.001  | <.001  | <.001   | <.001   | .006    | <.001    | <.001   | <.001   | <.001   |
|          | N                   | 165          | 165     | 165    | 165    | 165     | 165    | 165    | 165    | 165    | 165     | 165     | 165     | 165      | 165     | 165     | 165     |
| M4       | Pearson Correlation | .184*        | .270**  | .583** | .679** | .296**  | 1      | .267** | .275** | .324** | .296**  | .313**  | -.048   | -.093    | .235**  | .230**  | .259**  |
|          | Sig. (2-tailed)     | .018         | <.001   | <.001  | <.001  | <.001   |        | <.001  | <.001  | <.001  | <.001   | <.001   | .541    | .233     | .002    | .003    | <.001   |
|          | N                   | 165          | 165     | 165    | 165    | 165     | 165    | 165    | 165    | 165    | 165     | 165     | 165     | 165      | 165     | 165     | 165     |
| M5       | Pearson Correlation | .155*        | .175*   | .211** | .260** | .404**  | .267** | 1      | .536** | .311** | .216**  | .251**  | .060    | .009     | .202**  | .251**  | .234**  |
|          | Sig. (2-tailed)     | .046         | .025    | .007   | <.001  | <.001   | <.001  |        | <.001  | <.001  | .005    | .001    | .445    | .906     | .009    | .001    | .002    |
|          | N                   | 165          | 165     | 165    | 165    | 165     | 165    | 165    | 165    | 165    | 165     | 165     | 165     | 165      | 165     | 165     | 165     |
| M6       | Pearson Correlation | .049         | .123    | .116   | .206** | .281**  | .275** | .536** | 1      | .153   | .175*   | .208**  | .073    | -.001    | .190*   | .166*   | .200**  |
|          | Sig. (2-tailed)     | .530         | .114    | .136   | .008   | <.001   | <.001  | <.001  |        | .050   | .024    | .007    | .354    | .992     | .015    | .033    | .010    |
|          | N                   | 165          | 165     | 165    | 165    | 165     | 165    | 165    | 165    | 165    | 165     | 165     | 165     | 165      | 165     | 165     | 165     |
| M7       | Pearson Correlation | -.016        | .115    | .242** | .310** | .256**  | .324** | .311** | .153   | 1      | -.028   | .015    | .200**  | .191*    | -.075   | -.017   | -.017   |
|          | Sig. (2-tailed)     | .835         | .142    | .002   | <.001  | <.001   | <.001  | <.001  | .050   |        | .725    | .848    | .010    | .014     | .340    | .828    | .825    |
|          | N                   | 165          | 165     | 165    | 165    | 165     | 165    | 165    | 165    | 165    | 165     | 165     | 165     | 165      | 165     | 165     | 165     |
| Qavei    | Pearson Correlation | .655**       | .472**  | .160*  | .213** | .418**  | .296** | .216** | .175*  | -.028  | 1       | .981**  | -.509** | -.546**  | .765**  | .784**  | .925**  |
|          | Sig. (2-tailed)     | <.001        | <.001   | .039   | .006   | <.001   | <.001  | .005   | .024   | .725   |         | <.001   | <.001   | <.001    | <.001   | <.001   | <.001   |
|          | N                   | 167          | 167     | 166    | 166    | 165     | 165    | 165    | 165    | 165    | 167     | 167     | 167     | 167      | 167     | 167     | 167     |
| Qaver    | Pearson Correlation | .647**       | .460**  | .176*  | .230** | .410**  | .313** | .251** | .208** | .015   | .981**  | 1       | -.333** | -.400**  | .748**  | .781**  | .923**  |
|          | Sig. (2-tailed)     | <.001        | <.001   | .024   | .003   | <.001   | <.001  | .001   | .007   | .848   | <.001   |         | <.001   | <.001    | <.001   | <.001   | <.001   |
|          | N                   | 167          | 167     | 166    | 166    | 165     | 165    | 165    | 165    | 165    | 167     | 167     | 167     | 167      | 167     | 167     | 167     |
| Qdiff    | Pearson Correlation | -.316**      | -.252** | .000   | -.015  | -.212** | -.048  | .060   | .073   | .200** | -.509** | -.333** | 1       | .882**   | -.400** | -.344** | -.402** |
|          | Sig. (2-tailed)     | <.001        | .001    | .999   | .849   | .006    | .541   | .445   | .354   | .010   | <.001   | <.001   |         | <.001    | <.001   | <.001   | <.001   |
|          | N                   | 167          | 167     | 166    | 166    | 165     | 165    | 165    | 165    | 165    | 167     | 167     | 167     | 167      | 167     | 167     | 167     |
| Nretakes | Pearson Correlation | -.375**      | -.310** | -.112  | -.112  | -.273** | -.093  | .009   | -.001  | .191*  | -.546** | -.400** | .882**  | 1        | -.429** | -.410** | -.447** |
|          | Sig. (2-tailed)     | <.001        | <.001   | .152   | .151   | <.001   | .233   | .906   | .992   | .014   | <.001   | <.001   | <.001   |          | <.001   | <.001   | <.001   |
|          | N                   | 167          | 167     | 166    | 166    | 165     | 165    | 165    | 165    | 165    | 167     | 167     | 167     | 167      | 167     | 167     | 167     |
| Midterm  | Pearson Correlation | .589**       | .411**  | .172*  | .120   | .432**  | .235** | .202** | .190*  | -.075  | .765**  | .748**  | -.400** | -.429**  | 1       | .766**  | .857**  |
|          | Sig. (2-tailed)     | <.001        | <.001   | .027   | .123   | <.001   | .002   | .009   | .015   | .340   | <.001   | <.001   | <.001   | <.001    |         | <.001   | <.001   |
|          | N                   | 167          | 167     | 166    | 166    | 165     | 165    | 165    | 165    | 165    | 167     | 167     | 167     | 167      | 167     | 167     | 167     |
| Final    | Pearson Correlation | .571**       | .468**  | .181*  | .155*  | .429**  | .230** | .251** | .166*  | -.017  | .784**  | .781**  | -.344** | -.410**  | .766**  | 1       | .909**  |
|          | Sig. (2-tailed)     | <.001        | <.001   | .020   | .046   | <.001   | .003   | .001   | .033   | .828   | <.001   | <.001   | <.001   | <.001    | <.001   |         | <.001   |
|          | N                   | 167          | 167     | 166    | 166    | 165     | 165    | 165    | 165    | 165    | 167     | 167     | 167     | 167      | 167     | 167     | 167     |
| Overall  | Pearson Correlation | .641**       | .486**  | .163*  | .169*  | .460**  | .259** | .234** | .200** | -.017  | .925**  | .923**  | -.402** | -.447**  | .857**  | .909**  | 1       |
|          | Sig. (2-tailed)     | <.001        | <.001   | .035   | .030   | <.001   | <.001  | .002   | .010   | .825   | <.001   | <.001   | <.001   | <.001    | <.001   | <.001   |         |
|          | N                   | 167          | 167     | 166    | 166    | 165     | 165    | 165    | 165    | 165    | 167     | 167     | 167     | 167      | 167     | 167     | 167     |

\*\*, Correlation is significant at the 0.01 level (2-tailed).

\*, Correlation is significant at the 0.05 level (2-tailed).

**Legend:** M0-M7 = measures described in detail in the text, Qavei = initial Quiz average, Qaver = Quiz average considering retakes, Qdiff = difference in Quiz average, Nretakes = number of retakes, Midterm = Midterm exam average, Final = Final exam average, Overall = overall course average.

**Table S5.** Correlations among Measures in the quiz-retake general chemistry II section.

|         |                     | Correlations |        |        |        |         |        |        |        |        |         |         |         |         |         |         |         |
|---------|---------------------|--------------|--------|--------|--------|---------|--------|--------|--------|--------|---------|---------|---------|---------|---------|---------|---------|
|         |                     | M0           | M00    | M1     | M2     | M3      | M4     | M5     | M6     | M7     | Qavei   | Qaver   | Qdiff   | Nretake | Midterm | Final   | Overall |
| M0      | Pearson Correlation | 1            | .957** | .005   | .174*  | .211**  | .150   | .179*  | .100   | -.127  | .334**  | .347**  | -.038   | -.051   | .311**  | .324**  | .347**  |
|         | Sig. (2-tailed)     |              | <.001  | .947   | .026   | .007    | .055   | .022   | .204   | .106   | <.001   | <.001   | .622    | .510    | <.001   | <.001   | <.001   |
|         | N                   | 172          | 172    | 164    | 164    | 163     | 163    | 163    | 163    | 163    | 172     | 172     | 172     | 172     | 172     | 172     | 172     |
| M00     | Pearson Correlation | .957**       | 1      | .005   | .174*  | .211**  | .150   | .179*  | .100   | -.127  | .338**  | .349**  | -.048   | -.068   | .323**  | .330**  | .351**  |
|         | Sig. (2-tailed)     | <.001        |        | .947   | .026   | .007    | .055   | .022   | .204   | .106   | <.001   | <.001   | .534    | .378    | <.001   | <.001   | <.001   |
|         | N                   | 172          | 172    | 164    | 164    | 163     | 163    | 163    | 163    | 163    | 172     | 172     | 172     | 172     | 172     | 172     | 172     |
| M1      | Pearson Correlation | .005         | .005   | 1      | .490** | .196*   | .509** | -.054  | -.162* | .159*  | .065    | .039    | -.130   | -.154*  | .035    | .080    | .050    |
|         | Sig. (2-tailed)     | .947         | .947   |        | <.001  | .012    | <.001  | .493   | .039   | .043   | .409    | .620    | .097    | .050    | .661    | .310    | .522    |
|         | N                   | 164          | 164    | 164    | 164    | 163     | 163    | 163    | 163    | 163    | 164     | 164     | 164     | 164     | 164     | 164     | 164     |
| M2      | Pearson Correlation | .174*        | .174*  | .490** | 1      | .296**  | .719** | .173*  | .237** | .160*  | .151    | .151    | -.041   | -.031   | .163*   | .322**  | .210**  |
|         | Sig. (2-tailed)     | .026         | .026   | <.001  |        | <.001   | <.001  | .027   | .002   | .041   | .053    | .054    | .601    | .697    | .036    | <.001   | .007    |
|         | N                   | 164          | 164    | 164    | 164    | 163     | 163    | 163    | 163    | 163    | 164     | 164     | 164     | 164     | 164     | 164     | 164     |
| M3      | Pearson Correlation | .211**       | .211** | .196*  | .296** | 1       | .292** | .456** | .152   | .145   | .343**  | .317**  | -.200*  | -.232** | .347**  | .287**  | .335**  |
|         | Sig. (2-tailed)     | .007         | .007   | .012   | <.001  |         | <.001  | <.001  | .052   | .065   | <.001   | <.001   | .010    | .003    | <.001   | <.001   | <.001   |
|         | N                   | 163          | 163    | 163    | 163    | 163     | 163    | 163    | 163    | 163    | 163     | 163     | 163     | 163     | 163     | 163     | 163     |
| M4      | Pearson Correlation | .150         | .150   | .509** | .719** | .292**  | 1      | .277** | .227** | .220** | .280**  | .279**  | -.078   | -.092   | .271**  | .382**  | .325**  |
|         | Sig. (2-tailed)     | .055         | .055   | <.001  | <.001  | <.001   |        | <.001  | .004   | .005   | <.001   | <.001   | .322    | .242    | <.001   | <.001   | <.001   |
|         | N                   | 163          | 163    | 163    | 163    | 163     | 163    | 163    | 163    | 163    | 163     | 163     | 163     | 163     | 163     | 163     | 163     |
| M5      | Pearson Correlation | .179*        | .179*  | -.054  | .173*  | .456**  | .277** | 1      | .375** | .263** | .213**  | .235**  | .039    | -.011   | .176*   | .164*   | .224**  |
|         | Sig. (2-tailed)     | .022         | .022   | .493   | .027   | <.001   | <.001  |        | <.001  | <.001  | .006    | .003    | .625    | .889    | .025    | .036    | .004    |
|         | N                   | 163          | 163    | 163    | 163    | 163     | 163    | 163    | 163    | 163    | 163     | 163     | 163     | 163     | 163     | 163     | 163     |
| M6      | Pearson Correlation | .100         | .100   | -.162* | .237** | .152    | .227** | .375** | 1      | .127   | .085    | .118    | .121    | .121    | .118    | .178*   | .175*   |
|         | Sig. (2-tailed)     | .204         | .204   | .039   | .002   | .052    | .004   | <.001  |        | .106   | .280    | .135    | .124    | .123    | .133    | .023    | .026    |
|         | N                   | 163          | 163    | 163    | 163    | 163     | 163    | 163    | 163    | 163    | 163     | 163     | 163     | 163     | 163     | 163     | 163     |
| M7      | Pearson Correlation | -.127        | -.127  | .159*  | .160*  | .145    | .220** | .263** | .127   | 1      | -.053   | -.047   | .040    | .072    | -.146   | -.077   | -.071   |
|         | Sig. (2-tailed)     | .106         | .106   | .043   | .041   | .065    | .005   | <.001  | .106   |        | .503    | .552    | .615    | .362    | .064    | .331    | .368    |
|         | N                   | 163          | 163    | 163    | 163    | 163     | 163    | 163    | 163    | 163    | 163     | 163     | 163     | 163     | 163     | 163     | 163     |
| Qavei   | Pearson Correlation | .334**       | .338** | .065   | .151   | .343**  | .280** | .213** | .085   | -.053  | 1       | .978**  | -.376** | -.474** | .709**  | .674**  | .884**  |
|         | Sig. (2-tailed)     | <.001        | <.001  | .409   | .053   | <.001   | <.001  | .006   | .280   | .503   |         | <.001   | <.001   | <.001   | <.001   | <.001   | <.001   |
|         | N                   | 172          | 172    | 164    | 164    | 163     | 163    | 163    | 163    | 163    | 163     | 172     | 172     | 172     | 172     | 172     | 172     |
| Qaver   | Pearson Correlation | .347**       | .349** | .039   | .151   | .317**  | .279** | .235** | .118   | -.047  | .978**  | 1       | -.173*  | -.305** | .703**  | .690**  | .901**  |
|         | Sig. (2-tailed)     | <.001        | <.001  | .620   | .054   | <.001   | <.001  | .003   | .135   | .552   | <.001   |         | .023    | <.001   | <.001   | <.001   | <.001   |
|         | N                   | 172          | 172    | 164    | 164    | 163     | 163    | 163    | 163    | 163    | 172     | 172     | 172     | 172     | 172     | 172     | 172     |
| Qdiff   | Pearson Correlation | -.038        | -.048  | -.130  | -.041  | -.200*  | -.078  | .039   | .121   | .040   | -.376** | -.173*  | 1       | .878**  | -.221** | -.114   | -.168*  |
|         | Sig. (2-tailed)     | .622         | .534   | .097   | .601   | .010    | .322   | .625   | .124   | .615   | <.001   | .023    |         | <.001   | .004    | .137    | .027    |
|         | N                   | 172          | 172    | 164    | 164    | 163     | 163    | 163    | 163    | 163    | 172     | 172     | 172     | 172     | 172     | 172     | 172     |
| Nretake | Pearson Correlation | -.051        | -.068  | -.154* | -.031  | -.232** | -.092  | -.011  | .121   | .072   | -.474** | -.305** | .878**  | 1       | -.343** | -.221** | -.307** |
|         | Sig. (2-tailed)     | .510         | .378   | .050   | .697   | .003    | .242   | .889   | .123   | .362   | <.001   | <.001   | <.001   |         | <.001   | .004    | <.001   |
|         | N                   | 172          | 172    | 164    | 164    | 163     | 163    | 163    | 163    | 163    | 172     | 172     | 172     | 172     | 172     | 172     | 172     |
| Midterm | Pearson Correlation | .311**       | .323** | .035   | .163*  | .347**  | .271** | .176*  | .118   | -.146  | .709**  | .703**  | -.221** | -.343** | 1       | .776**  | .885**  |
|         | Sig. (2-tailed)     | <.001        | <.001  | .661   | .036   | <.001   | <.001  | .025   | .133   | .064   | <.001   | <.001   | .004    | <.001   |         | <.001   | <.001   |
|         | N                   | 172          | 172    | 164    | 164    | 163     | 163    | 163    | 163    | 163    | 172     | 172     | 172     | 172     | 172     | 172     | 172     |
| Final   | Pearson Correlation | .324**       | .330** | .080   | .322** | .287**  | .382** | .164*  | .178*  | -.077  | .674**  | .690**  | -.114   | -.221** | .776**  | 1       | .877**  |
|         | Sig. (2-tailed)     | <.001        | <.001  | .310   | <.001  | <.001   | <.001  | .036   | .023   | .331   | <.001   | <.001   | .137    | .004    | <.001   |         | <.001   |
|         | N                   | 172          | 172    | 164    | 164    | 163     | 163    | 163    | 163    | 163    | 172     | 172     | 172     | 172     | 172     | 172     | 172     |
| Overall | Pearson Correlation | .347**       | .351** | .050   | .210** | .335**  | .325** | .224** | .175*  | -.071  | .884**  | .901**  | -.168*  | -.307** | .885**  | .877**  | 1       |
|         | Sig. (2-tailed)     | <.001        | <.001  | .522   | .007   | <.001   | <.001  | .004   | .026   | .368   | <.001   | <.001   | .027    | <.001   | <.001   | <.001   | <.001   |
|         | N                   | 172          | 172    | 164    | 164    | 163     | 163    | 163    | 163    | 163    | 172     | 172     | 172     | 172     | 172     | 172     | 172     |

\*\*, Correlation is significant at the 0.01 level (2-tailed).

\*, Correlation is significant at the 0.05 level (2-tailed).

**Legend:** M0-M7 = measures described in detail in the text, Qavei = initial Quiz average, Qaver = Quiz average considering retakes, Qdiff = difference in Quiz average, Nretakes = number of retakes, Midterm = Midterm exam average, Final = Final exam average, Overall = overall course average.

**Table S6.** Group statistics for the general chemistry I retake comparison. Key: Group Q1nr are students who failed at least one quiz but did not opt for a retake, while Q1r are those students who failed at least one quiz and opted for a retake.

| Item                       | Group | <i>n</i> | Mean ( <i>SD</i> ) |
|----------------------------|-------|----------|--------------------|
| M0                         | Q1nr  | 27       | 6.04 (1.56)        |
|                            | Q1r   | 36       | 5.17 (2.08)        |
| M00                        | Q1nr  | 27       | 2.76 (0.78)        |
|                            | Q1r   | 36       | 2.46 (0.78)        |
| M1                         | Q1nr  | 26       | 2.31 (0.54)        |
|                            | Q1r   | 36       | 2.36 (0.67)        |
| M2                         | Q1nr  | 26       | 3.31 (0.62)        |
|                            | Q1r   | 36       | 3.30 (0.73)        |
| M3                         | Q1nr  | 25       | 3.73 (0.73)        |
|                            | Q1r   | 36       | 3.41 (0.84)        |
| M4                         | Q1nr  | 25       | 2.95 (0.78)        |
|                            | Q1r   | 36       | 3.05 (0.68)        |
| M5                         | Q1nr  | 25       | 3.50 (0.55)        |
|                            | Q1r   | 36       | 3.65 (0.61)        |
| M6                         | Q1nr  | 25       | 3.88 (0.59)        |
|                            | Q1r   | 36       | 4.08 (0.78)        |
| M7                         | Q1nr  | 25       | 3.21 (1.00)        |
|                            | Q1r   | 36       | 3.79 (0.74)        |
| Q <sub>ave</sub> (initial) | Q1nr  | 27       | 72.8 (8.8)         |
|                            | Q1r   | 36       | 70.0 (11.1)        |
| Q <sub>ave</sub> (final)   | Q1nr  | 27       | 72.8 (8.8)         |
|                            | Q1r   | 36       | 75.0 (10.7)        |
| Midterm Exam               | Q1nr  | 27       | 75.0 (13.3)        |
|                            | Q1r   | 36       | 73.0 (12.2)        |
| Final Exam                 | Q1nr  | 27       | 62.3 (17.8)        |
|                            | Q1r   | 36       | 63.7 (18.6)        |

**Table S7.** Group Statistics for the general chemistry II retake comparison. Key: Group Q1nr are students who failed at least one quiz but did not opt for a retake, while Q1r are those students who failed at least one quiz and opted for a retake.

| Item                       | Group | <i>n</i> | Mean ( <i>SD</i> ) |
|----------------------------|-------|----------|--------------------|
| M0                         | Q1nr  | 42       | 4.57 (1.75)        |
|                            | Q1r   | 39       | 5.00 (1.85)        |
| M00                        | Q1nr  | 42       | 0.46 (0.18)        |
|                            | Q1r   | 39       | 0.48 (0.19)        |
| M1                         | Q1nr  | 42       | 2.43 (0.59)        |
|                            | Q1r   | 36       | 2.29 (0.67)        |
| M2                         | Q1nr  | 42       | 3.19 (0.74)        |
|                            | Q1r   | 36       | 3.30 (0.59)        |
| M3                         | Q1nr  | 41       | 3.45 (0.72)        |
|                            | Q1r   | 36       | 3.35 (0.63)        |
| M4                         | Q1nr  | 41       | 3.04 (0.55)        |
|                            | Q1r   | 36       | 3.24 (0.67)        |
| M5                         | Q1nr  | 41       | 3.52 (0.59)        |
|                            | Q1r   | 36       | 3.76 (0.44)        |
| M6                         | Q1nr  | 41       | 3.48 (0.54)        |
|                            | Q1r   | 36       | 3.88 (0.41)        |
| M7                         | Q1nr  | 41       | 3.27 (0.65)        |
|                            | Q1r   | 36       | 3.40 (0.75)        |
| Q <sub>ave</sub> (initial) | Q1nr  | 42       | 72.7 (8.3)         |
|                            | Q1r   | 39       | 74.4 (10.0)        |
| Q <sub>ave</sub> (final)   | Q1nr  | 42       | 72.7 (8.3)         |
|                            | Q1r   | 39       | 78.8 (9.4)         |
| Midterm Exam               | Q1nr  | 42       | 67.6 (15.3)        |
|                            | Q1r   | 39       | 67.3 (16.4)        |
| Final Exam                 | Q1nr  | 42       | 59.4 (18.4)        |
|                            | Q1r   | 39       | 66.7 (14.1)        |



**Table S8.** Paired t-test results for female students across general chemistry I and II courses for the quiz-retake sections.

| Item | Group       | <i>n</i> | Mean ( <i>SD</i> ) | <i>t</i> statistic | <i>p</i> value (two tailed) | Cohen's <i>d</i> |
|------|-------------|----------|--------------------|--------------------|-----------------------------|------------------|
| M1   | GC II -GC I | 52       | 0.20 (0.62)        | 2.32               | 0.024 (n.s.)                | ...              |
| M2   | GC II -GC I | 52       | 0.13 (0.61)        | 1.54               | 0.13 (n.s.)                 | ...              |
| M3   | GC II -GC I | 52       | -0.03 (0.41)       | -0.53              | 0.60 (n.s.)                 | ...              |
| M4   | GC II -GC I | 52       | 0.28 (0.56)        | 3.56               | < 0.001                     | 0.50             |
| M5   | GC II -GC I | 52       | 0.01 (0.46)        | 0.09               | 0.93 (n.s.)                 | ...              |
| M6   | GC II -GC I | 52       | -0.44 (0.45)       | -7.10              | < 0.001                     | 0.98             |
| M7   | GC II -GC I | 52       | -0.09 (0.58)       | -1.11              | 0.27 (n.s.)                 | ...              |

**Table S9.** Paired t-test results for male students across general chemistry I and II courses for the quiz-retake sections.

| Item | Group       | <i>n</i> | Mean ( <i>SD</i> ) | <i>t</i> statistic | <i>p</i> value (two-tailed) | Cohen's <i>d</i> |
|------|-------------|----------|--------------------|--------------------|-----------------------------|------------------|
| M1   | GC II -GC I | 42       | 0.24 (0.56)        | 2.73               | 0.009                       | 0.42             |
| M2   | GC II -GC I | 42       | 0.11 (0.72)        | 1.02               | 0.31 (n.s.)                 | ...              |
| M3   | GC II -GC I | 41       | -0.24 (0.52)       | -2.89              | 0.006                       | 0.45             |
| M4   | GC II -GC I | 41       | 0.11 (0.59)        | 1.14               | 0.26 (n.s.)                 | ...              |
| M5   | GC II -GC I | 41       | -0.13 (0.41)       | -2.03              | 0.049 (n.s.)                | ...              |
| M6   | GC II -GC I | 41       | -0.55 (0.54)       | -6.62              | < 0.001                     | 1.03             |
| M7   | GC II -GC I | 41       | -0.09 (0.71)       | -0.77              | 0.45 (n.s.)                 | ...              |

**Table S10.** Paired t-test results for general chemistry I group Q1r students across general chemistry I and II courses for the quiz-retake sections.

| Item | Group       | <i>n</i> | Mean ( <i>SD</i> ) | <i>t</i> statistic | <i>p</i> value (two-tailed) | Cohen's <i>d</i> |
|------|-------------|----------|--------------------|--------------------|-----------------------------|------------------|
| M1   | GC II -GC I | 16       | 0.21 (0.77)        | 1.08               | 0.30 (n.s.)                 | ...              |
| M2   | GC II -GC I | 16       | -0.43 (0.73)       | -2.35              | 0.033 (n.s.)                | ...              |
| M3   | GC II -GC I | 16       | -0.31 (0.60)       | -2.04              | 0.06 (n.s.)                 | ...              |
| M4   | GC II -GC I | 16       | -0.06 (0.65)       | -0.36              | 0.73 (n.s.)                 | ...              |
| M5   | GC II -GC I | 16       | -0.27 (0.43)       | -2.55              | 0.022 (n.s.)                | ...              |
| M6   | GC II -GC I | 16       | -0.57 (0.60)       | -3.76              | 0.002                       | 0.94             |
| M7   | GC II -GC I | 16       | -0.26 (0.63)       | -1.69              | 0.12 (n.s.)                 | ...              |

**Table S11.** Paired t-test results for general chemistry I group Q1nr students across general chemistry I and II courses for the quiz-retake sections.

| Item | Group       | <i>n</i> | Mean ( <i>SD</i> ) | <i>t</i> statistic | <i>p</i> value (two-tailed) | Cohen's <i>d</i> |
|------|-------------|----------|--------------------|--------------------|-----------------------------|------------------|
| M1   | GC II -GC I | 11       | 0.32 (0.52)        | 2.02               | 0.07 (n.s.)                 | ...              |
| M2   | GC II -GC I | 11       | 0.16 (0.70)        | 0.75               | 0.47 (n.s.)                 | ...              |
| M3   | GC II -GC I | 10       | -0.21 (0.46)       | -1.44              | 0.18 (n.s.)                 | ...              |
| M4   | GC II -GC I | 10       | 0.21 (0.55)        | 1.20               | 0.26 (n.s.)                 | ...              |
| M5   | GC II -GC I | 10       | -0.27 (0.27)       | -3.07              | 0.013 (n.s.)                | ...              |
| M6   | GC II -GC I | 10       | -0.51 (0.37)       | -4.39              | 0.002                       | 1.39             |
| M7   | GC II -GC I | 10       | 0.08 (0.73)        | 0.33               | 0.75 (n.s.)                 | ...              |

**Figure S1.** Evolution in assessment strategy over time.

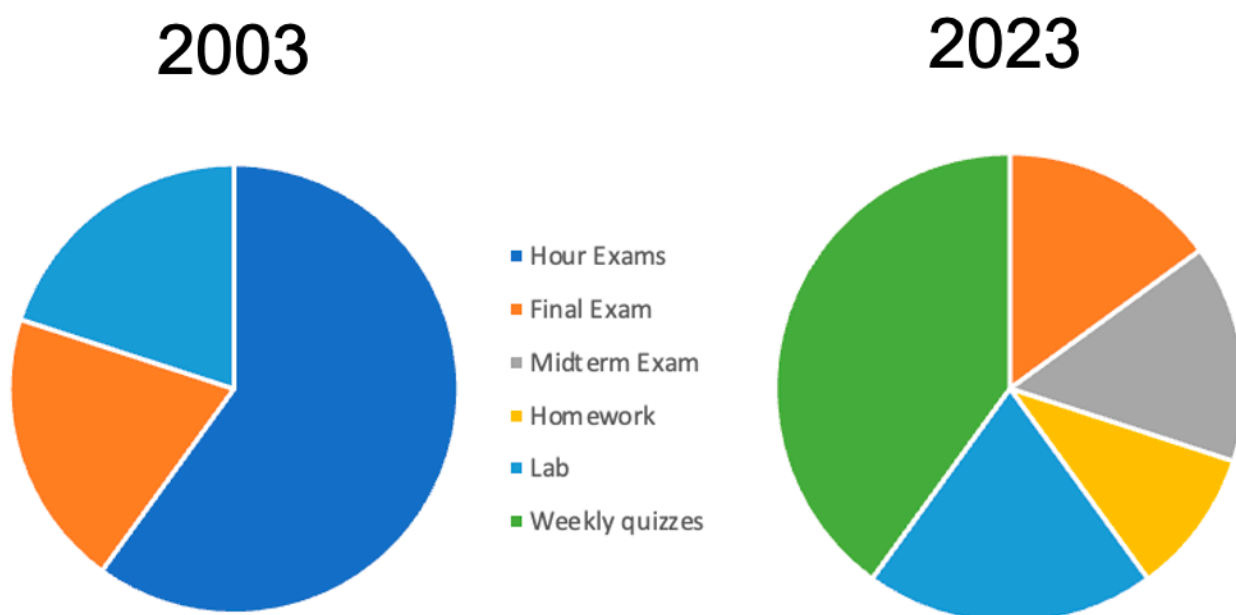

**Figure S2.** AMOS v29 path diagram with standardized estimates for the ASCIv2 CFA, using data from all sections. The factors correspond to intellectual accessibility (F1) and emotional satisfaction (F2).

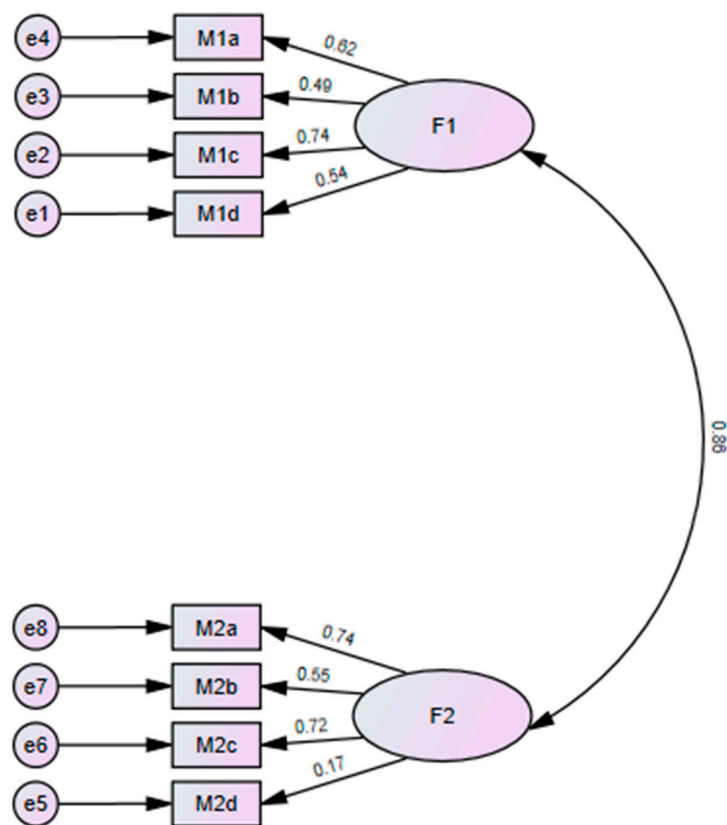

**Figure S3.** AMOS v29 path diagram with standardized estimates for the CSCI CFA, using data from all sections. The factors correspond to mathematical self-concept (MSC), chemistry self-concept (CHSC), academic self-concept (ASC), academic enjoyment self-concept (AE), and creativity self-concept (CSC).

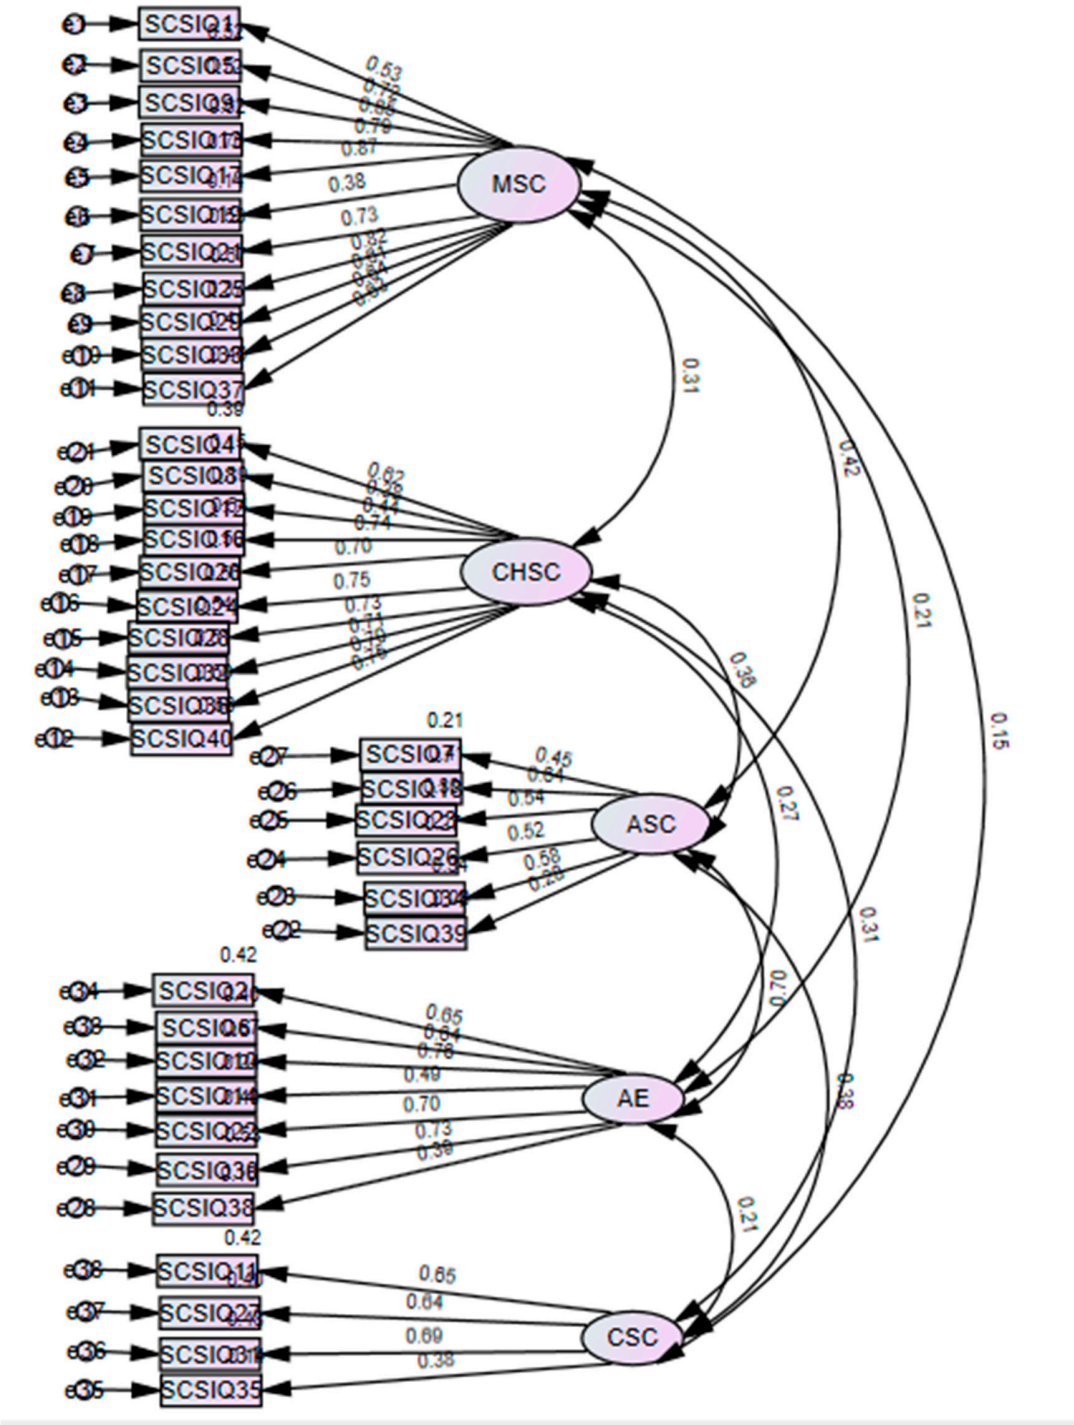

Supplement: s1 [file s1]
